# Supplementary material for: Investigating the Diversity and Host Range of Novel Parvoviruses from North American Ducks Using Epidemiology, Phylogenetics, Genome Structure, and Codon Usage Analysis
Source: PubMed Central journal article supplement (PMC7912424; doi:10.3390/v13020193), 2021-01-28

# Investigating the diversity and host range of novel parvoviruses from North American ducks using epidemiology, phylogenetics, genome structure, and codon usage analysis

Marta Canuti, Joost T. P. Verhoeven, Hannah J. Munro, Sheena Roul, Davor Ojkic, Gregory J. Robertson, Hugh G. Whitney, Suzanne C. Dufour and Andrew S. Lang

## Table of content

|                                                                                                                                                        |   |
|--------------------------------------------------------------------------------------------------------------------------------------------------------|---|
| Supplementary Table S1. Primers used for VidION. ....                                                                                                  | 2 |
| Supplementary Table S2. Duck-associated chapparvovirus (DAC) and duck-associated ambidensovirus (DAAD) positivity rates in different duck groups. .... | 2 |
| Supplementary Table S3. Viruses identified in single and multiple infections. ....                                                                     | 2 |
| Supplementary Figure S1. Phylogenetic analysis of the duck-associated chapparvovirus (DAC) within the <i>Hamaparvovirinae</i> . ....                   | 3 |
| Supplementary Figure S2. Phylogenetic analyses of the partially sequenced duck-associated chapparvoviruses (DAC). ....                                 | 4 |
| Supplementary Figure S3. Phylogenetic analysis of the duck-associated ambidensovirus (DAAD) within the <i>Densovirinae</i> . ....                      | 5 |
| Supplementary Figure S4. Similarity plot between duck-associated ambidensoviruses (DAAD) identified in this study. ....                                | 6 |

**Supplementary Table S1. Primers used for VidION.**

| Step                          | Primer name | Primer sequence 5'→3'            |
|-------------------------------|-------------|----------------------------------|
| Random amplification          | VDNF        | GTTGGTGCTGATATTGCNNNNNNNNN       |
|                               | VDNR        | CCTGTCGCTCTATCTTCNNNNNNNNN       |
| Sequencing library generation | VDF         | TCATCTCATCTTTCTGTTGGTGCTGATATTGC |
|                               | VDR         | CCTCTCTATGACTTGCCTGTCGCTCTATCTTC |
| Library enrichment            | MIF         | TTTCTGTTGGTGCTGATATTGC           |
|                               | MIR         | ACTTGCCTGTCGCTCTATCTTC           |

**Supplementary Table S2. Duck-associated chapparvovirus (DAC) and duck-associated ambidensovirus (DAAD) positivity rates in different duck groups.**

| Variable |                            | DAC       | DAAD       |
|----------|----------------------------|-----------|------------|
| Age      | Adult, N=89                | 4 (4.5%)  | 19 (21.4%) |
|          | Juvenile, N=31             | 3 (9.7%)  | 6 (19.4%)  |
| Sex      | Female, N=63               | 4 (6.3%)  | 9 (14.3%)  |
|          | Male, N=58                 | 2 (3.5%)  | 15 (25.9%) |
| Season   | Autumn <sup>1</sup> , N=81 | 6 (7.4%)  | 20 (24.7%) |
|          | Winter <sup>1</sup> , N=41 | 1 (2.4%)  | 6 (14.6%)  |
| Location | Quidi Vidi Lake, N=11      | 3 (27.3)  | 5 (45.5%)  |
|          | Bowring Park, N=107        | 2 (1.9%)  | 21 (19.6%) |
| Year     | 2014, N=91                 | 1 (1.1%)  | 14 (15.4%) |
|          | 2015, N=18                 | 6 (33.3%) | 8 (44.4%)  |
|          | 2018, N=12                 | 0 (0.0%)  | 3 (25.0%)  |

<sup>1</sup> Autumn: September to November, Winter: February to April.

**Supplementary Table S3. Viruses identified in single and multiple infections.**

|            |                                    | N  | %    |
|------------|------------------------------------|----|------|
| DAC, N=7   | DAC single infection               | 3  | 42.9 |
|            | DAC + avian influenza virus        | 1  | 14.3 |
|            | DAC + DAAD + avian influenza virus | 1  | 14.3 |
|            | DAC + DAAD + duck calicivirus B6   | 1  | 14.3 |
|            | DAC + DAAD + duck papillomavirus 3 | 1  | 14.3 |
| DAAD, N=26 | DAAD single infections             | 17 | 65.4 |
|            | DAAD + duck papillomavirus 3       | 4  | 15.4 |
|            | DAAD + avian influenza virus       | 2  | 7.7  |
|            | DAAC + DAD + avian influenza virus | 1  | 3.8  |
|            | DAAC + DAD + duck calicivirus B6   | 1  | 3.8  |
|            | DAAC + DAD + duck papillomavirus 3 | 1  | 3.8  |

**Supplementary Figure S1. Phylogenetic analysis of the duck-associated chapparovirus (DAC) within the *Hamaparvovirinae*.**

The phylogenetic tree based on 101 full NS1 protein sequences was built with the maximum-likelihood method based on the LG+F+R6 model with IQ-Tree. The outcome of the SH-aLRT and bootstrap test are shown for the main nodes. The branches of the tree are color-coded based on the host in which viruses have been identified and red represents avian hosts, while black includes all other vertebrate and invertebrate hosts.

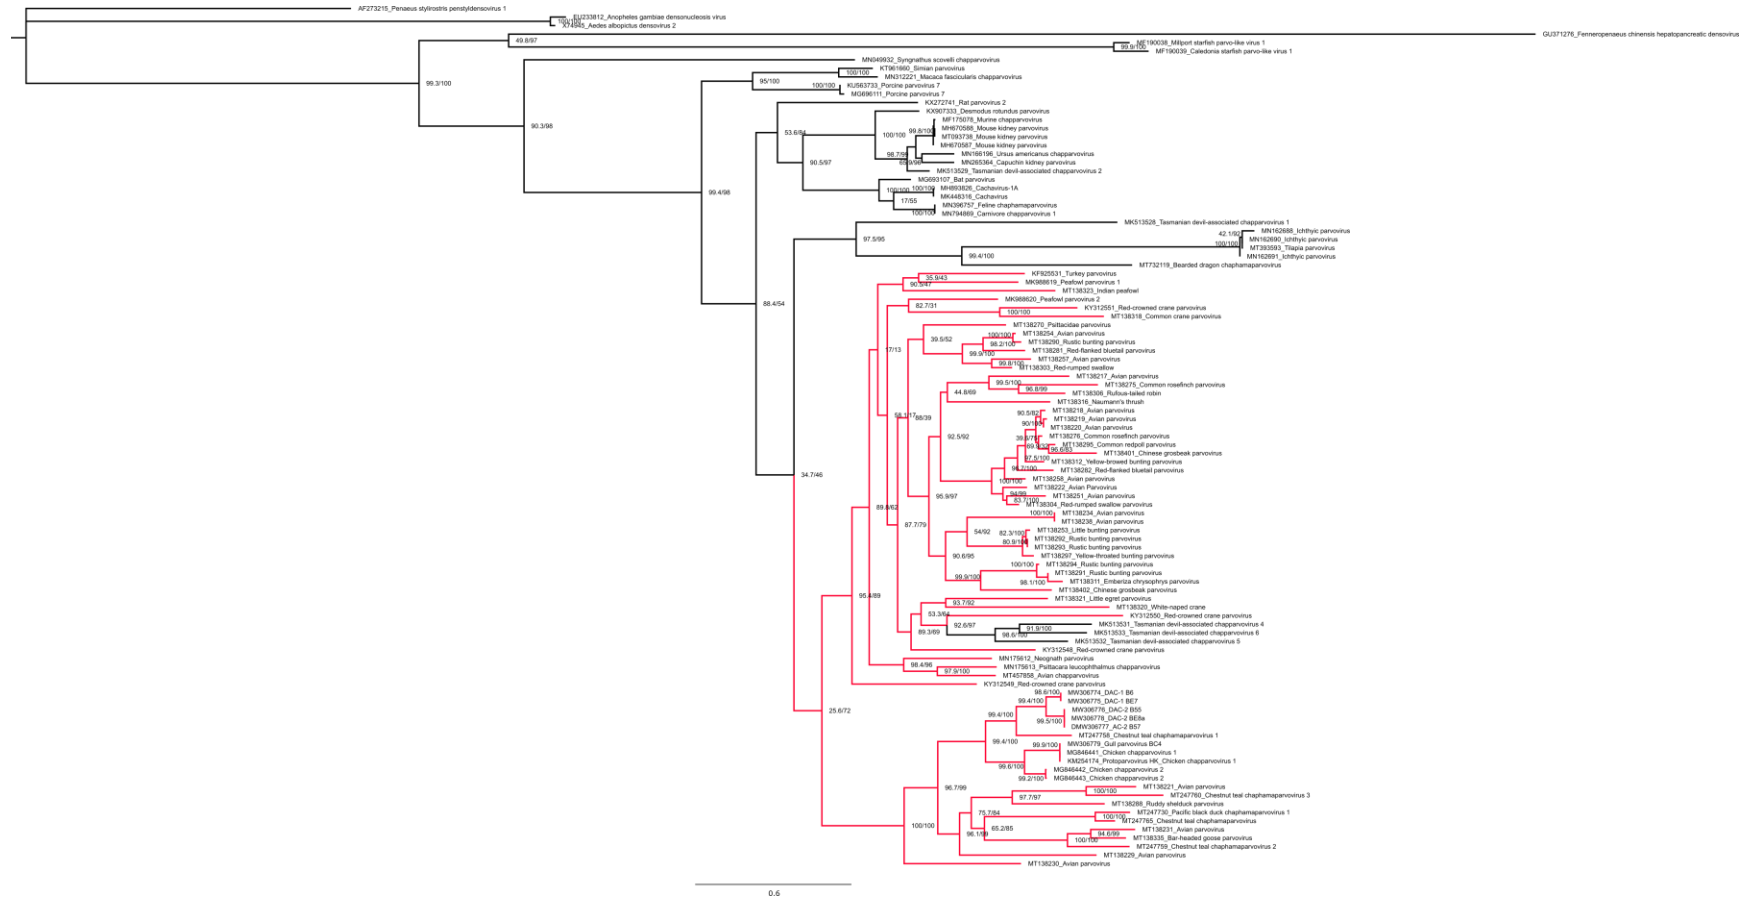



**Supplementary Figure S3. Phylogenetic analysis of the duck-associated ambidensovirus (DAAD) within the *Densovirinae*.**

The phylogenetic tree based on 117 full NS1 protein sequences was built with the maximum-likelihood method based on the LG+F+R6 model with IQ-Tree. The outcome of the SH-aLRT and bootstrap test are shown for main nodes. The branches of the tree are color-coded based on the taxonomy and red represents putative members of the genus *Protoambidensovirus*.

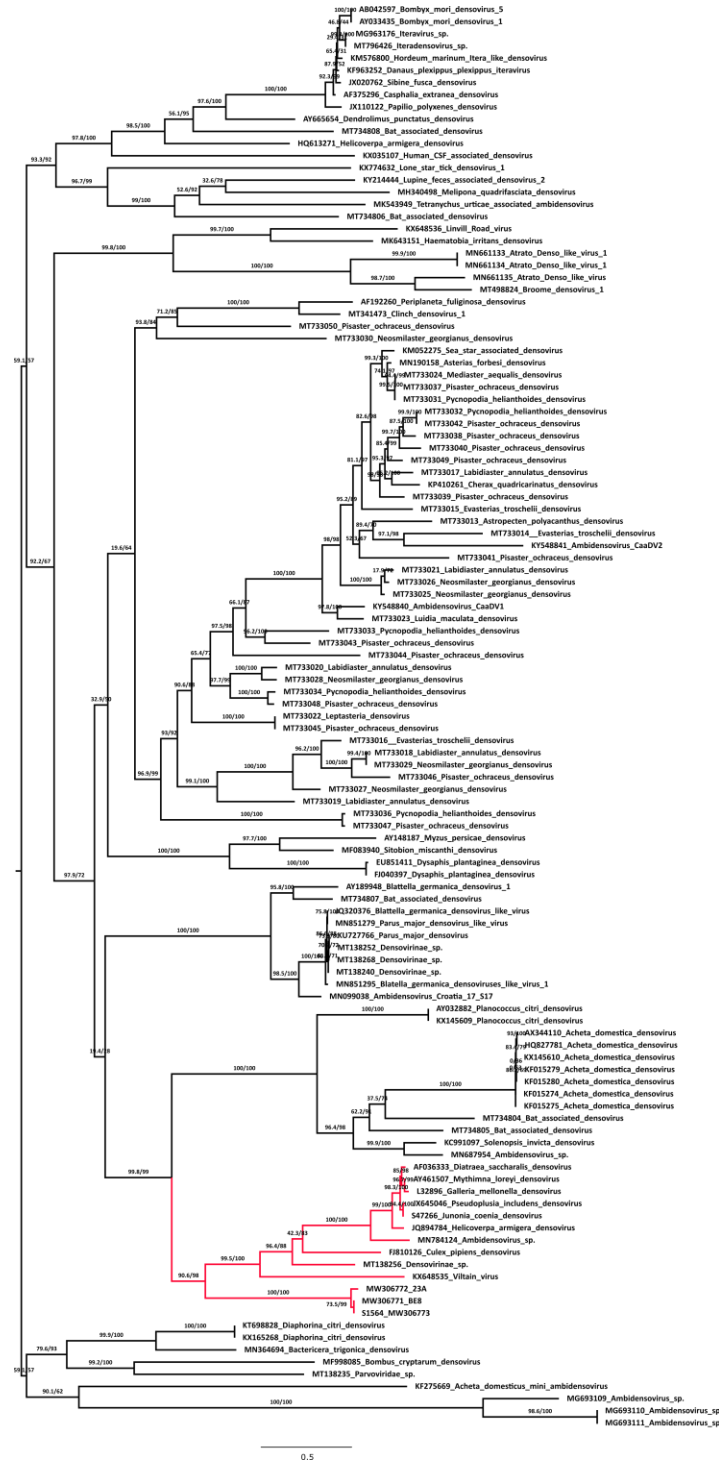

**Supplementary Figure S4. Similarity plot between duck-associated ambidensoviruses (DAAD) identified in this study.**

The similarity plot was generated with Simplot using strain BE8 as query. The identity between the two strains s1564 and 23A and the query (Y axis) across the genome (X axis) is shown and parameters used for the analysis are indicated at the bottom.

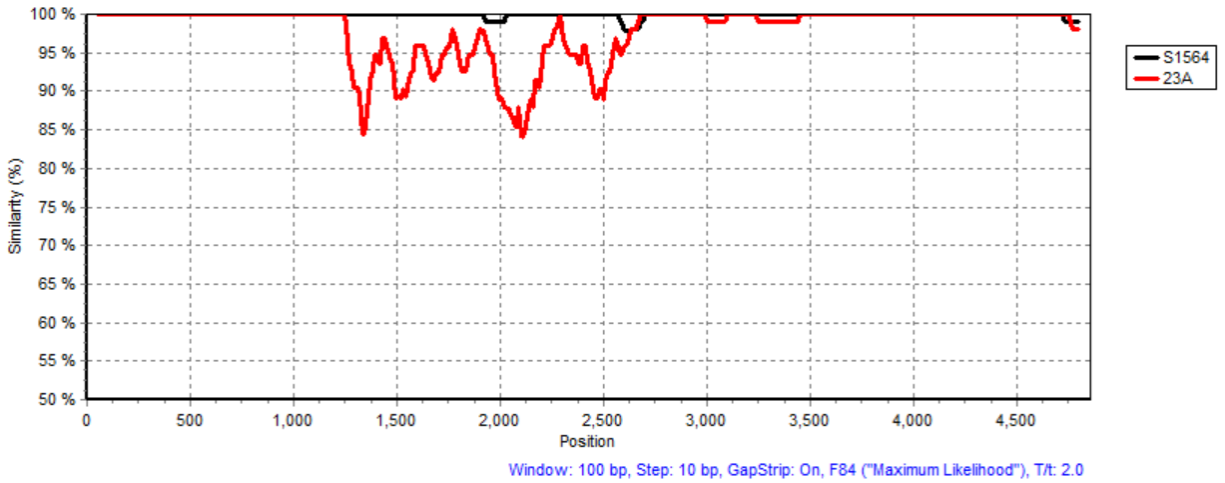

Supplement: viruses-13-00193-s001.pdf [file viruses-13-00193-s001.pdf]
